# Supplementary figures and images for: Distinct and replicable genetic risk factors for acute respiratory distress syndrome of pulmonary or extrapulmonary origin
Source: HighWire-hosted journal article supplement (doi:10.1136/jmedgenet-2012-100972), 2012-10-09

**A**

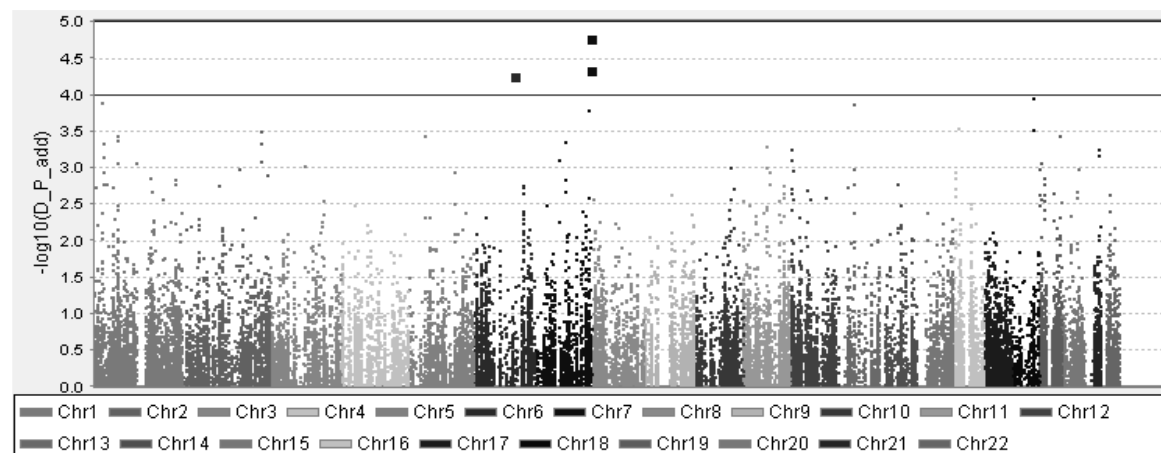

**B**

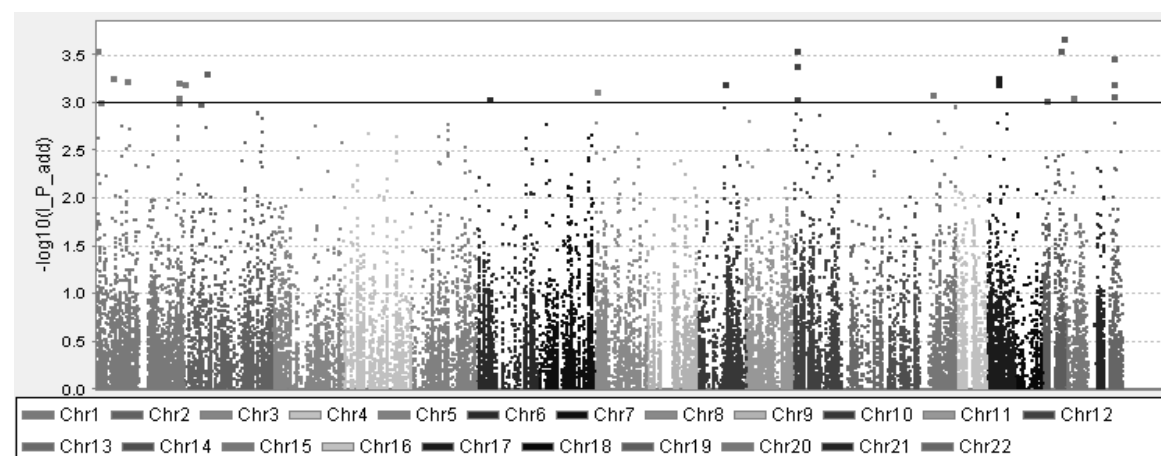

**Figure S3**

Supplement: jmedgenet-2012-100972supp_figure3.pdf [file jmedgenet-2012-100972supp_figure3.pdf]

## Q-Q plots

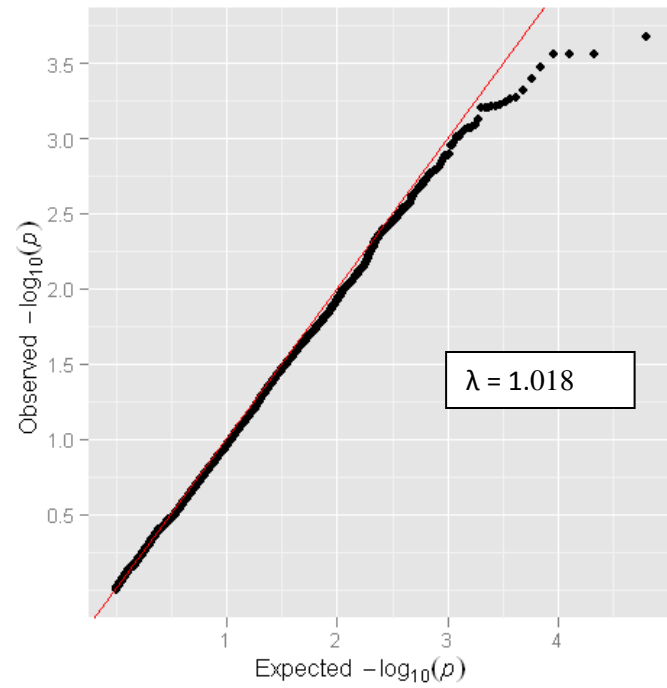

**A**

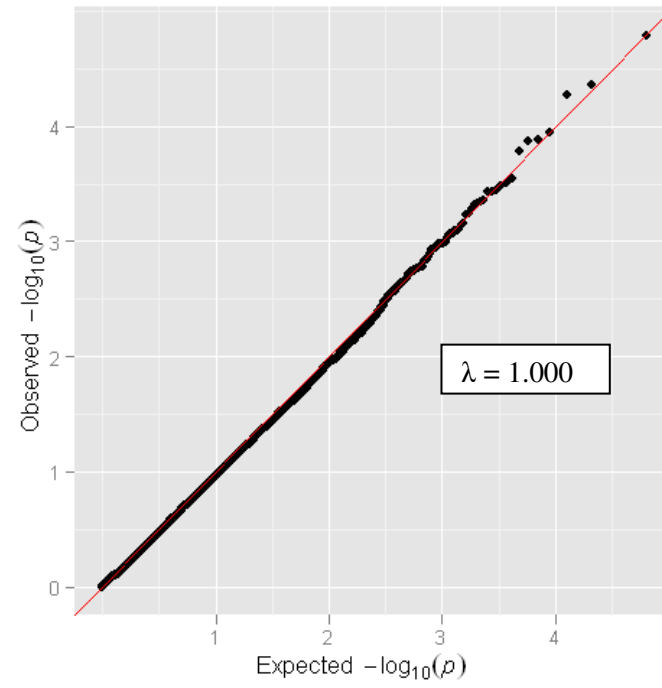

**B**

**Figure S4**

Supplement: jmedgenet-2012-100972supp_figure4.pdf [file jmedgenet-2012-100972supp_figure4.pdf]

### Regional Association plot of *FAAH* with ALI in Stage II Population I

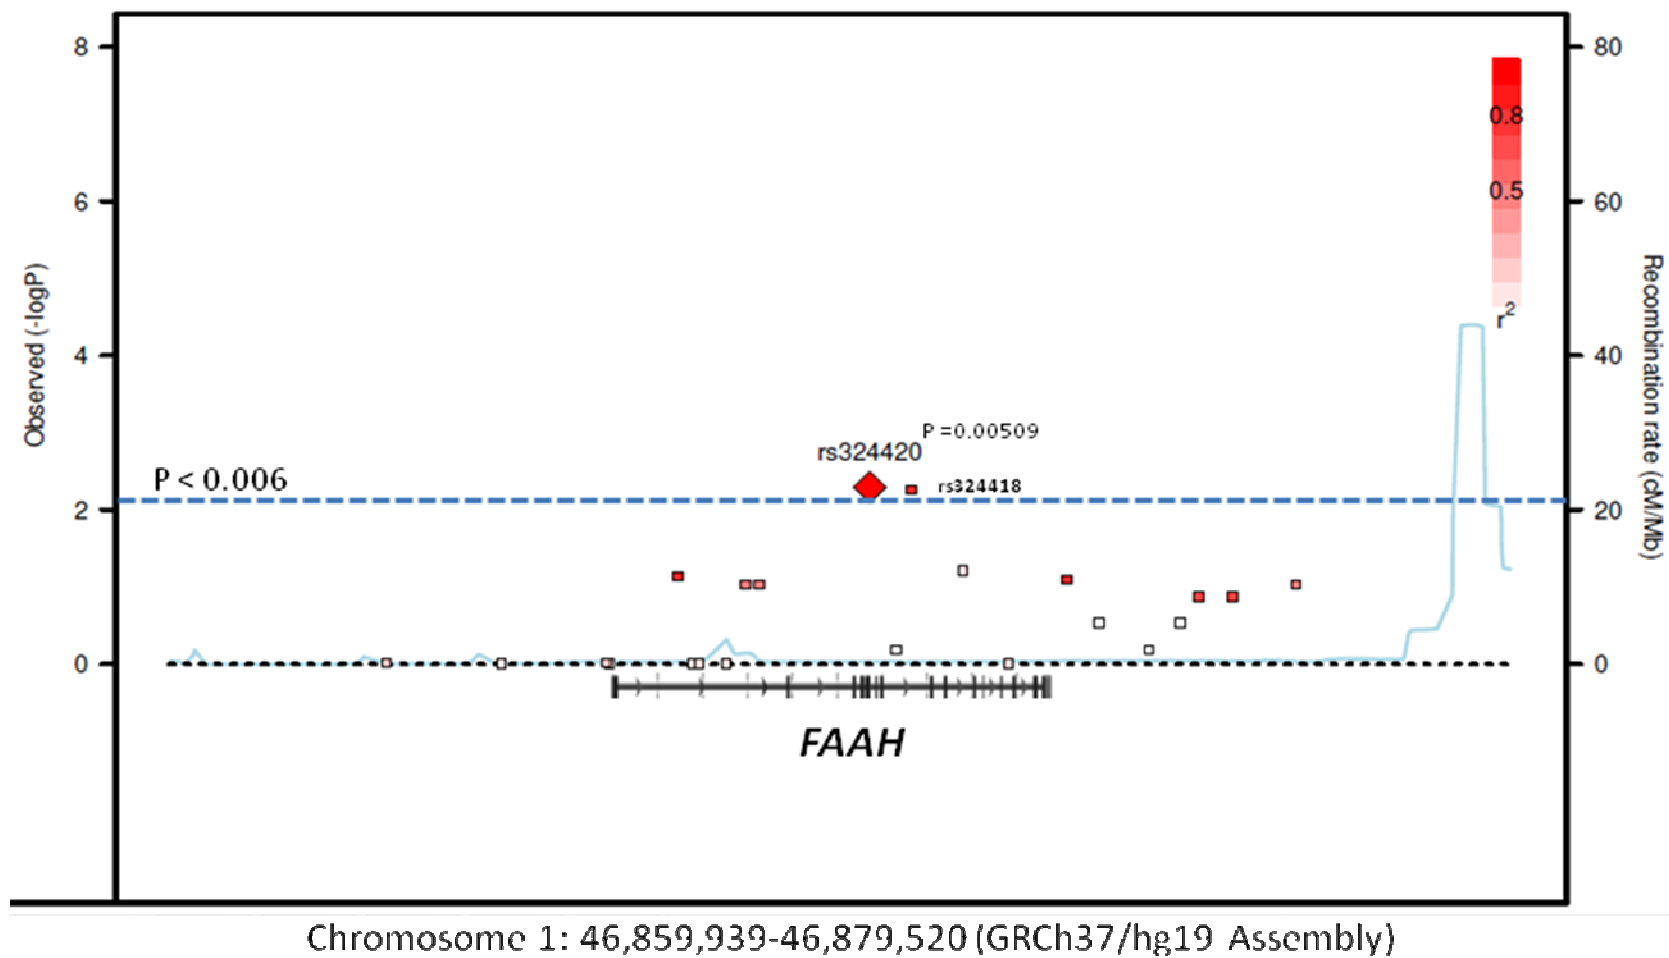

Figure S5

Supplement: jmedgenet-2012-100972supp_figure5.pdf [file jmedgenet-2012-100972supp_figure5.pdf]

Regional Association plot of *POPDC3* with ARDS in Stage II Population II

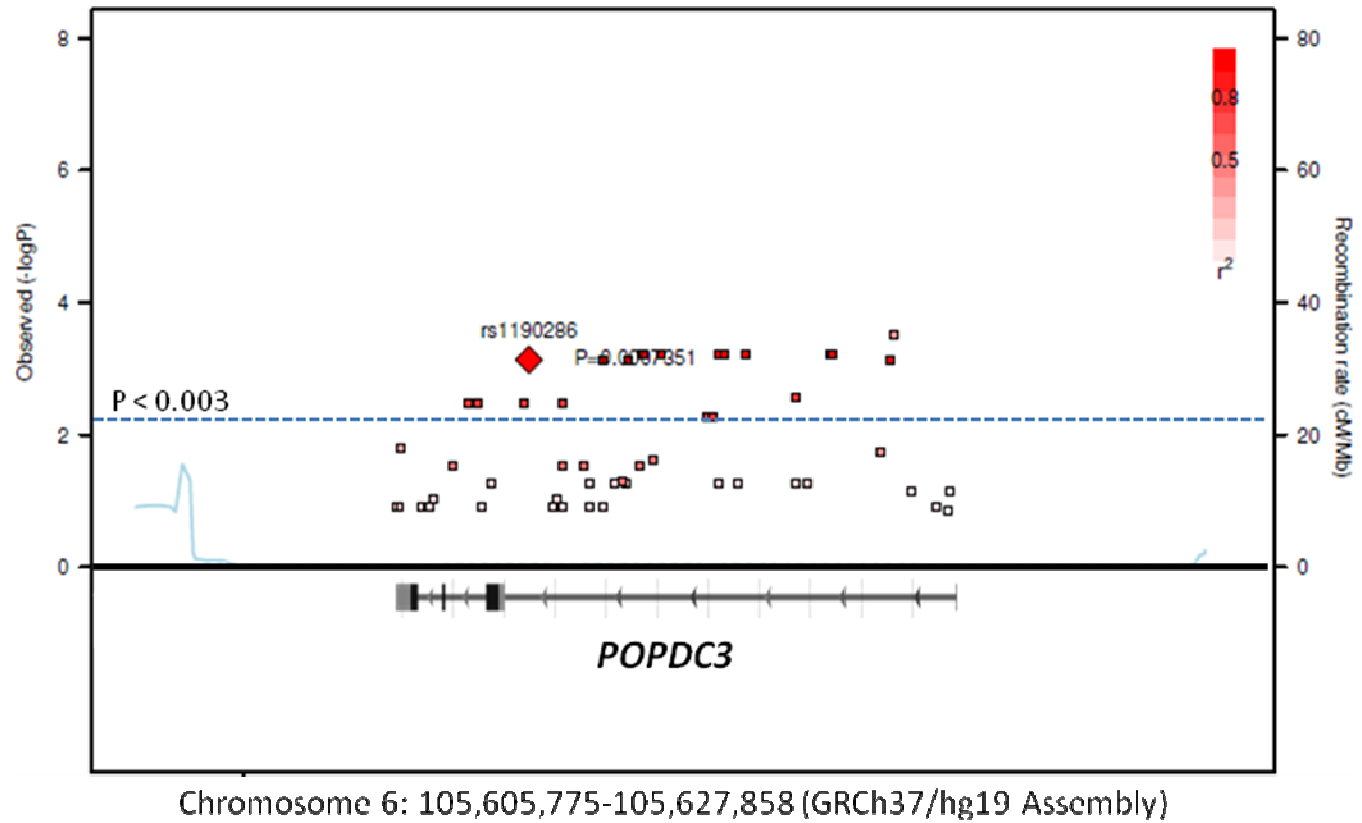

FigureS6

Supplement: jmedgenet-2012-100972supp_figure6.pdf [file jmedgenet-2012-100972supp_figure6.pdf]

# Study Overview

## Discovery Phase

## Validation Phase

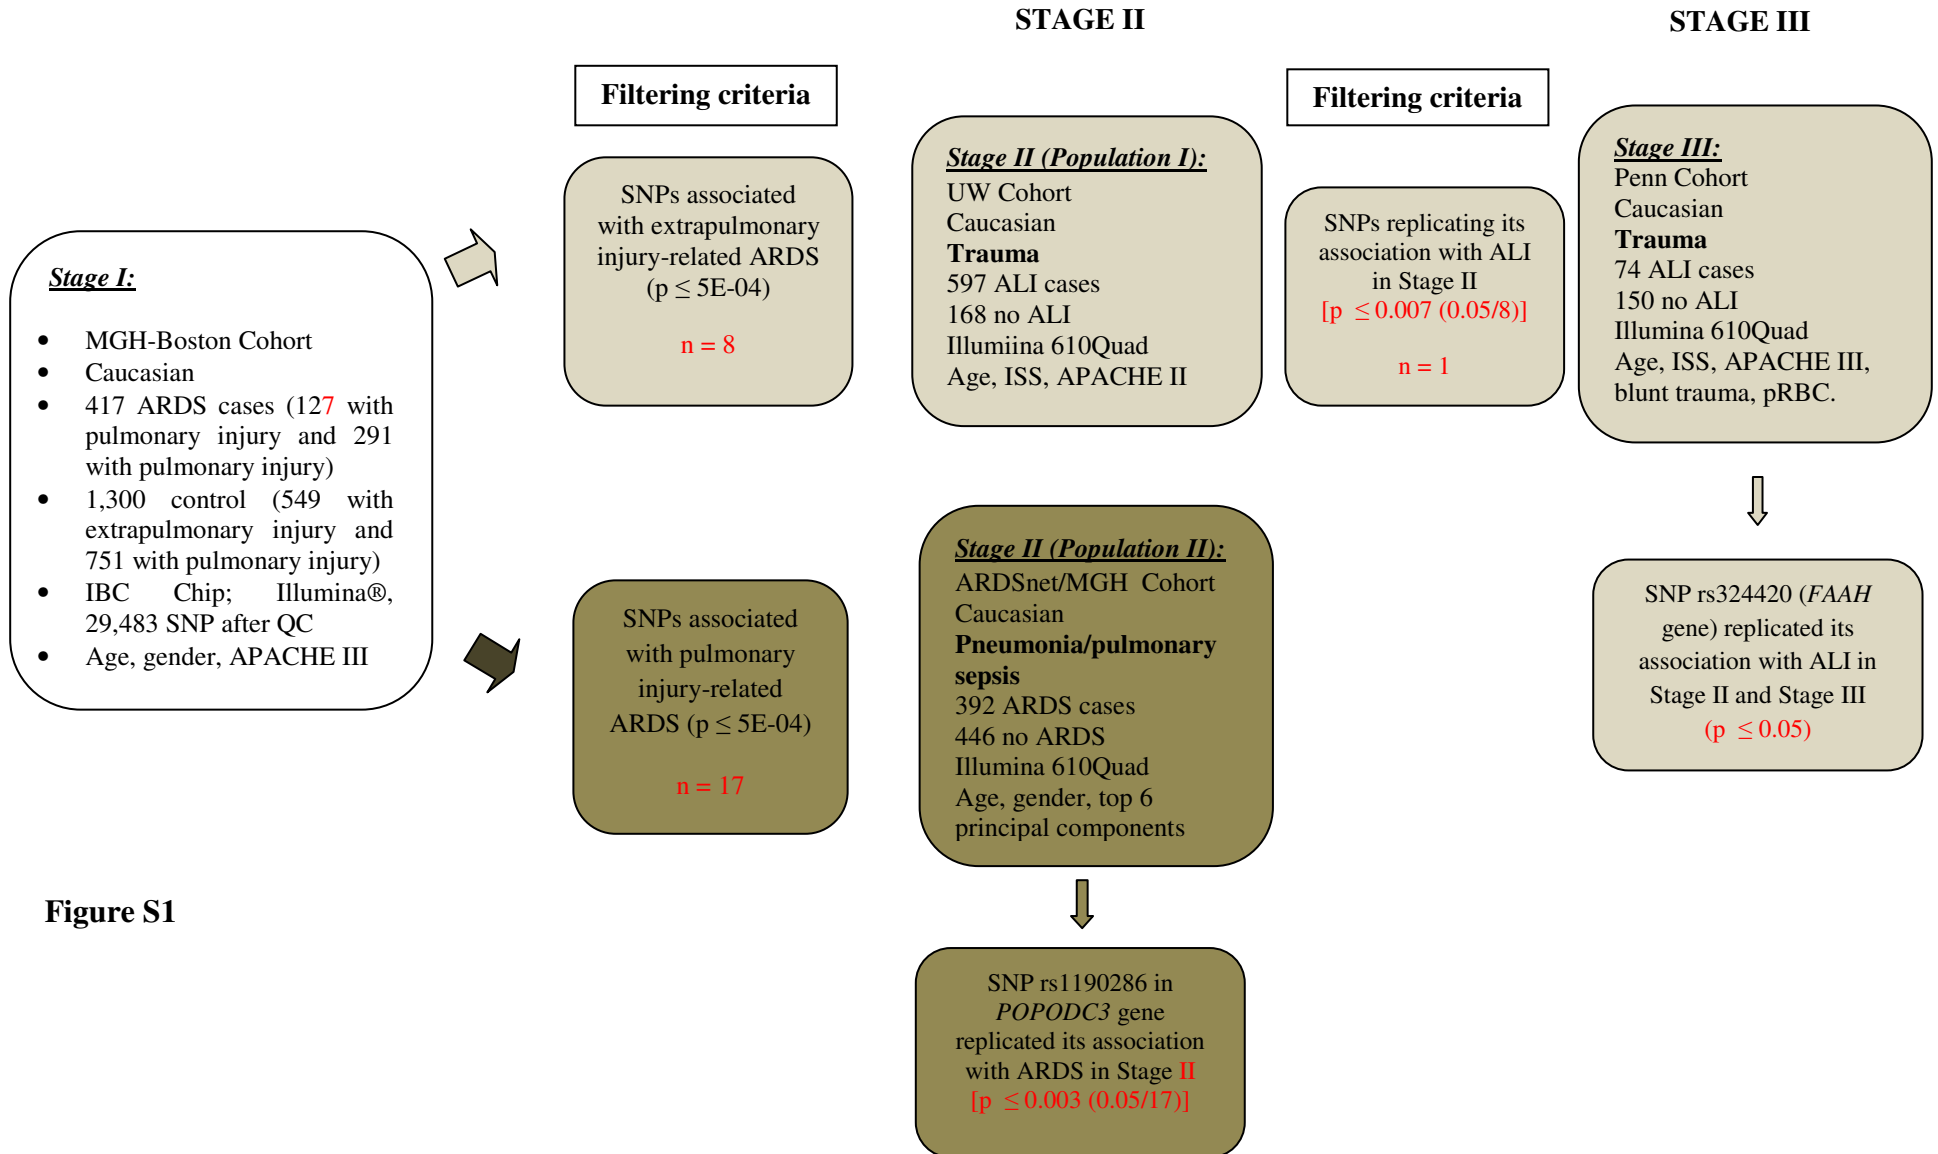

Figure S1

Supplement: jmedgenet-2012-100972supp_figure1.pdf [file jmedgenet-2012-100972supp_figure1.pdf]

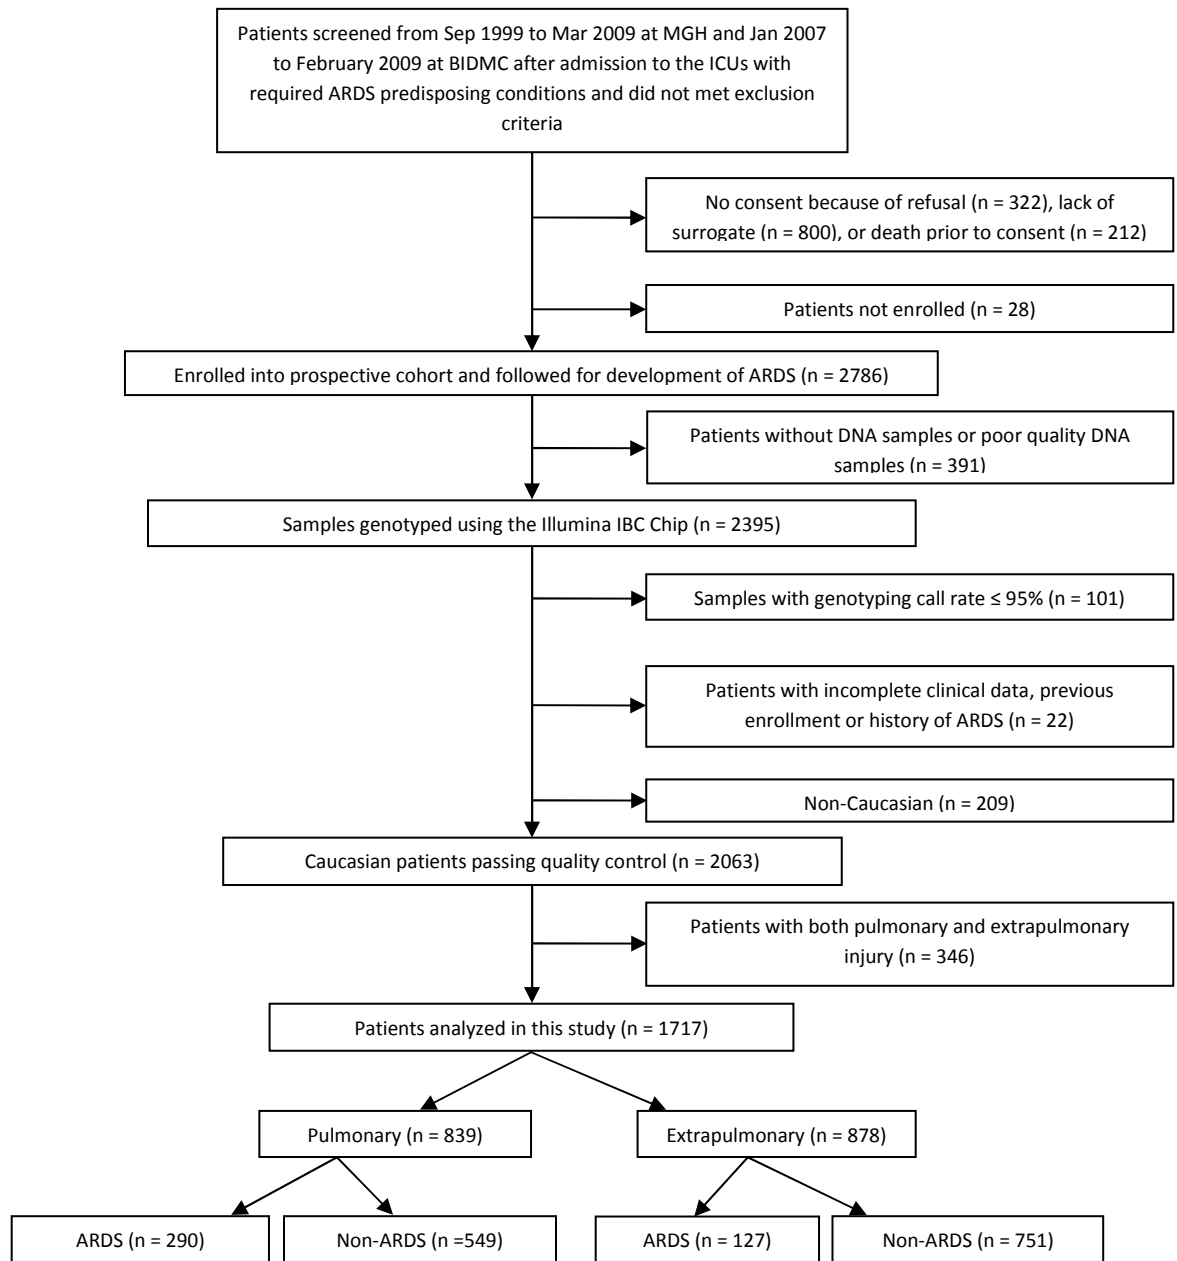

**Figure S2**

Supplement: jmedgenet-2012-100972supp_figure2.pdf [file jmedgenet-2012-100972supp_figure2.pdf]
